# Supplementary material
Source: publisher figshare collection journal article supplement (https://wiley.figshare.com/articles/dataset/_/3547200)
Supplement: Supplementary file 1 [file 1 › appendix-A.htm]

Ecological Archives E091-121-A1


### *Ecological Archives* E091-121-A1

### **Silke Bauer, Bruno J. Ens, and Marcel Klaassen. 2010. Many routes lead to Rome: potential causes for the multi-route migration system of Red Knots, *Calidris canutus islandica*. *Ecology* 91:1822–1831.**

Appendix A. Model description.

> View / download PDF.

---


[Back to E091-121]
